# Supplementary material for: Easily-soluble heteroacene bis(benzothieno)silole derivatives for sensing of nitro explosives
Source: Royal Society of Chemistry journal article supplement (doi:10.1039/c4nj00913d), 2014-08-08
Supplement: c4nj00913d1.pdf [file c4nj00913d1.pdf]

## Supporting Information for:

### Easily-Soluble Heteroacene Bis(benzothieno)silole Derivatives for Nitro Explosives Sensing

Yunfang Zhao<sup>a\*</sup>, Wanglong Hao<sup>b</sup>, Wangjing Ma<sup>c,\*</sup>, Zhanzhan Zang<sup>b</sup>, Huarong Zhang<sup>b</sup>, Xiaoxia Liu<sup>b</sup>, Sufen Zou<sup>b</sup>, Haixia Zhang<sup>b</sup>, Weichao Liu<sup>b</sup>, Jianhua Gao<sup>b,\*</sup>

<sup>a</sup> Modern Research Center for Traditional Chinese Medicine, Beijing University of Chinese Medicine, Beijing, 100029, P. R. China

<sup>b</sup> Key Laboratory of Organosilicon Chemistry and Material Technology of Ministry of Education, Hangzhou Normal University, Hangzhou 310012, P. R. China

<sup>c</sup> Technical Institute of Physics and Chemistry, Chinese Academy of Sciences, Beijing 100190, P. R. China

E-mail addresses: yunfang.zhao@163.com(Y. Zhao); wjma@mail.ipc.ac.cn (W. Ma); gaojh@hznu.edu.cn (J. Gao)

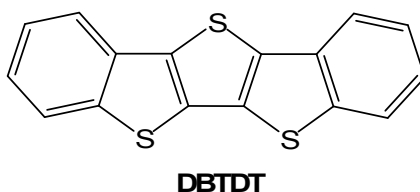

Scheme S1. Chemical structure of DBTDT.

Table S1, S2 and S3 gives the crystallographic data for the derivatives **4** and **6**.

**Table S1.** Crystal data and structure refinement parameters for **4** and **6**.

|                   | <b>BBTS-DM (4)</b> | <b>BBTS-M (6)</b> |
|-------------------|--------------------|-------------------|
| Molecular formula | C18 H14 S2 Si      | C17H11S2Si        |
| CCDC number       | 930047             | 930048            |
| Molecular weight  | 322.5              | 307.46            |
| a(Å)              | 22.468(2)          | 15.5429(17)       |
| b(Å)              | 22.468(2)          | 13.1602(15)       |
| c(Å)              | 13.1835(15)        | 7.4458(9)         |

|                                                |                   |                    |
|------------------------------------------------|-------------------|--------------------|
| $\alpha$<br>(°)                                | 90                | 90                 |
| $\beta$ (°)                                    | 90                | 90                 |
| $\gamma$ (°)                                   | 90                | 90                 |
| V(Å <sup>3</sup> )                             | 655.4(13)         | 1523.0(3)          |
| Z                                              | 16                | 8                  |
| Dc(g.cm <sup>-3</sup> )                        | 1.287             | 1.341              |
| Crystal system                                 | Tetragonal        | Orthorhombic       |
| space group                                    | I4(1)/a           | Cmc2(1)            |
| Temperature (K)                                | 296               | 296                |
| Wavelength Mo-K $\alpha$ (Å)                   | 0.71073           | 0.71073            |
| Crystal size(mm)                               | 0.32*0.2<br>*0.20 | 0.31*0.27*0.23     |
| $\mu$ (mm <sup>-1</sup> )                      | 0.382             | 0.414              |
| (000)                                          | 2688              | 636                |
| $\Theta$ limit(°)                              | 1.81~24.99        | 2.62~27.52         |
| Index ranges hkl                               | -26<=h<=23        | -10<=h<=20         |
|                                                | -23<=k<=25        | -17<=k<=17         |
|                                                | -14<=l<=15        | -5<=l<=9           |
| Reflections collected                          | 12466             | 2829               |
| Independent reflections                        | 2909              | 1222               |
| Data/restraints/parameters                     | 2909 / 0 / 192    | 1222 / 1<br>95     |
| Goodness-of-fit on F <sup>2</sup>              | 1.053             | 1.109              |
| Final R indices [I>2 $\sigma$ (I)]             | R1 = 0.0468       | R1 = 0.0342        |
|                                                | wR2 = 0.121       | wR2 = 0.0969       |
| R indices (all data)                           | R1 = 0.0647       | R1 = 0.0375        |
|                                                | wR2 = 0.1369      | wR2 = 0.1008       |
| Largest diff peak and hole(e Å <sup>-3</sup> ) | 0.431 and -0.409  | 0.450 and<br>0.224 |

**Table S2:** Selected bond lengths [Å] for compounds **BBTS-DM (4)**

|         |          |
|---------|----------|
| Si1-C18 | 1.850(4) |
| Si1-C17 | 1.855(3) |
| Si1-C10 | 1.877(3) |
| Si1-C1  | 1.879(3) |
| S2-C8   | 1.727(3) |

|         |          |
|---------|----------|
| S2-C7   | 1.738(3) |
| S2-C12  | 1.693(5) |
| S2-C9   | 1.730(3) |
| C8-C1   | 1.362(4) |
| C8-C9   | 1.450(4) |
| C1-C2   | 1.431(4) |
| C10-C9  | 1.367(4) |
| C10-C11 | 1.424(4) |
| C11-C16 | 1.393(5) |
| C11-C12 | 1.437(5) |
| C7-C6   | 1.388(5) |
| C7-C2   | 1.416(4) |
| C2-C3   | 1.399(4) |
| C3-C4   | 1.373(5) |
| C4-C5   | 1.371(6) |
| C12-C13 | 1.394(6) |
| C16-C15 | 1.391(6) |
| C13-C14 | 1.368(8) |
| C6-C5   | 1.370(6) |

**Table S3:** Selected bond lengths [Å] for compounds **BBTS-DM (6)**

|         |          |
|---------|----------|
| Si1-C10 | 1.836(5) |
| Si1-C3  | 1.864(3) |
| S1-C1   | 1.725(2) |
| S1-C4   | 1.741(3) |
| C1-C3   | 1.369(3) |
| C1-C1A  | 1.465(5) |
| C2-C6   | 1.388(4) |
| C2-C7   | 1.402(4) |
| C3-C7   | 1.434(4) |
| C4-C5   | 1.395(3) |
| C4-C7   | 1.418(3) |
| C5-C8   | 1.377(5) |
| C6-C8   | 1.394(4) |
